# Supplementary material for: Genetic Variation between Asian and Mediterranean Populations of Cucurbit Aphid-Borne Yellows Virus
Source: MDPI journal article supplement (doi:10.3390/v15081714), 2023-08-09
Supplement: s1 [file s1]

# Genetic Variation between Asian and Mediterranean Populations of Cucurbit Aphid-Borne Yellows Virus

Parastoo Pouraziz <sup>1</sup>, Milad Yousefi <sup>1</sup>, Adyatma Irawan Santosa <sup>2,\*</sup> and Davoud Koolivand <sup>1</sup>

<sup>1</sup> Department of Plant Protection, Faculty of Agriculture, University of Zanjan, Zanjan 45371-38111, Iran; koolivand@znu.ac.ir (D.K.)

<sup>2</sup> Department of Plant Protection, Faculty of Agriculture, Universitas Gadjah Mada, Yogyakarta 55281, Indonesia

\* Correspondence: adyatma.i.s@ugm.ac.id

**Table S1.** Putative recombination events detected in the ORF3/4 of CABYV genome by RDP4 analysis.

| No. | Recombinant Sequence(s) | Minor Parental Sequence(s) | Major Parental Sequence(s) | RDP      | GENECONV | Bootscan | Maxchi   | Chimaera | SiScan   | PhylPro |
|-----|-------------------------|----------------------------|----------------------------|----------|----------|----------|----------|----------|----------|---------|
| 1.  | HQ439023                | KR231951                   | Unknown (NC_003688)        | 6.91E-62 | 9.50E-58 | 1.79E-64 | 1.36E-30 | 1.57E-32 | 8.43E-37 | -       |
| 2.  | OM948835                | OM948855                   | Unknown (OM948846)         | 2.06E-34 | 1.12E-26 | 7.94E-32 | 6.81E-24 | 1.83E-23 | 4.40E-28 | -       |
| 3.  | OM948841                | Unknown (OM948849)         | OM948840                   | 6.38E-33 | 9.35E-28 | 1.54E-18 | 2.60E-24 | 1.32E-18 | 5.31E-30 | -       |
| 4.  | JQ700306                | Unknown (OM948855)         | JQ700305                   | 1.92E-26 | 3.01E-50 | 3.47E-18 | 2.57E-28 | 3.53E-20 | 4.20E-46 | -       |
| 5.  | OM948839                | OM948847                   | OM948845                   | 7.41E-25 | 1.62E-20 | -        | 4.76E-19 | 3.14E-18 | 8.48E-19 | -       |
| 6.  | OM948845                | Unknown (OM948854)         | OM948855                   | 2.49E-23 | 7.48E-19 | 1.13E-09 | 1.89E-10 | 5.63E-09 | 2.41E-10 | -       |
| 7.  | LC082306                | KR231948                   | EU636992                   | 1.64E-20 | 7.78E-21 | 2.09E-21 | 2.86E-19 | 6.37E-10 | 1.26E-26 | -       |

|     |          |                       |                       |          |          |          |          |          |          |   |
|-----|----------|-----------------------|-----------------------|----------|----------|----------|----------|----------|----------|---|
| 8.  | OM948838 | OM948847              | Unknown<br>(OM948834) | 1.12E-19 | 4.92E-18 | 3.24E-18 | 5.58E-18 | 5.36E-18 | 2.25E-18 | - |
| 9.  | OM948840 | OM948849              | OM948854              | 6.86E-17 | 2.40E-18 | 2.45E-12 | 2.60E-09 | 4.35E-09 | 6.06E-11 | - |
| 10. | KR231952 | EU636992              | KR231944              | 6.33E-11 | 8.28E-09 | 7.62E-09 | 6.27E-18 | 7.62E-15 | 2.23E-11 | - |
| 11. | MN688220 | Unknown<br>(JQ700305) | JF939813              | 5.23E-22 | 9.81E-41 | 1.93E-14 | 1.43E-21 | 2.60E-15 | 8.08E-34 | - |
| 12. | JF939813 | OM948856              | KR231945              | 6.99E-18 | 4.79E-30 | -        | 3.85E-17 | 3.03E-13 | 1.65E-25 | - |
| 13. | OM948834 | OM948851              | Unknown<br>(OM948836) | 8.11E-18 | 3.67E-16 | 1.20E-16 | 1.92E-12 | 3.11E-11 | 3.38E-14 | - |
| 14. | JQ700305 | LC472499              | OM948834              | 1.95E-31 | 1.11E-21 | 1.23E-30 | 2.03E-18 | 3.90E-13 | 1.17E-26 | - |
| 15. | KR231949 | MG257902              | EU636992              | 5.26E-14 | 2.08E-15 | 5.79E-20 | 2.02E-16 | 6.93E-16 | 1.13E-21 | - |
| 16. | OM948851 | OM948849              | OM948836              | 1.74E-15 | 4.59E-16 | 3.83E-14 | 1.21E-10 | 2.99E-09 | 5.92E-09 | - |
| 17. | OM948841 | Unknown<br>(KR231960) | OM948836              | 9.47E-14 | 4.21E-12 | 3.23E-05 | 3.64E-15 | 2.87E-12 | 7.43E-10 | - |
| 18. | OM948841 | OM948854              | Unknown<br>(OM948855) | 8.34E-15 | 1.79E-12 | 3.20E-09 | 8.36E-10 | 5.18E-10 | 9.27E-12 | - |
| 19. | EU636992 | NC_003688             | KR231957              | 1.08E-08 | 4.47E-06 | -        | 9.74E-14 | 1.08E-09 | 4.69E-29 | - |

|     |          |          |                        |          |          |          |          |          |          |   |
|-----|----------|----------|------------------------|----------|----------|----------|----------|----------|----------|---|
| 20. | OM948846 | OM948855 | Unknown<br>(NC_003688) | 2.19E-11 | 3.65E-10 | 4.52E-10 | 4.36E-13 | 4.99E-10 | 2.92E-18 | - |
| 21. | GQ221223 | KR231951 | Unknown<br>(KR231942)  | 6.59E-13 | 6.51E-10 | 5.70E-08 | 9.39E-11 | 2.88E-11 | 9.86E-16 | - |
| 22. | JF939814 | OM948851 | OM948855               | 5.12E-08 | 6.14E-09 | 9.36E-11 | 4.88E-12 | 8.86E-10 | 3.37E-17 | - |
| 23. | OM948835 | OM948854 | OM948849               | 3.46E-08 | 9.56E-11 | -        | 1.30E-09 | 2.94E-10 | 8.51E-08 | - |
| 24. | KR231949 | KR231948 | MK055337               | 2.51E-06 | 7.91E-08 | 9.66E-09 | 4.07E-09 | 1.95E-09 | 8.51E-21 | - |
| 25. | KR231952 | KR231956 | LC082306               | 8.03E-09 | 8.58E-08 | 4.69E-09 | 2.00E-06 | 5.40E-06 | 5.20E-06 | - |
| 26. | MT027103 | OM948836 | NC_003688              | 9.13E-07 | 2.50E-05 | 7.29E-07 | 5.96E-07 | 4.33E-08 | 2.23E-12 | - |
| 27. | JQ700306 | MK055337 | NC_003688              | 1.69E-06 | 5.11E-05 | -        | 7.92E-07 | 6.68E-06 | 1.48E-19 | - |

---
